# Supplementary material for: Psychometric properties of instruments for assessing adherence to oral antineoplastic agents: a COSMIN systematic review
Source: PeerJ journal article supplement (doi:10.7717/peerj.19088), 2025-03-12
Supplement: Supplementary_Table_S2.docx [file Supplementary_Table_S2.docx]

**Supplementary Table S2:** Search strategies of each database.

**PubMed**

Search time: 2024-1-26

| **Search** | **Query** |
| --- | --- |
| #1 | "medication adherence"[MeSH] OR "patient compliance"[MeSH] OR "medication adherence"[tiab] OR "patient compliance"[tiab] OR "medication compliance"[tiab] OR "patient adherence"[tiab] OR "medication persistence"[tiab] OR "drug adherence"[tiab] OR "drug compliance"[tiab] OR "medicine adherence"[tiab] OR "medicine compliance"[tiab] OR "treatment adherence"[tiab] OR "treatment compliance"[tiab] OR "adherence to treatment"[tiab] OR "compliance with treatment"[tiab] OR "therapy adherence"[tiab] OR "therapy compliance"[tiab] OR "adherence to therapy"[tiab] OR "compliance with therapy"[tiab] OR "adherence to pharmacotherapy"[tiab] OR "noncompliance"[tiab] OR "non compliance"[tiab] OR "nonadherence"[tiab] OR "non adherence"[tiab] |
| #2 | "neoplasms"[MeSH] OR "carcinoma"[MeSH] OR "sarcoma"[MeSH] OR "neoplasm*"[tiab] OR "carcino*"[tiab] OR "sarco*"[tiab] OR "cancer*"[tiab] OR "tumor*"[tiab] OR "malignan*"[tiab] OR "oncolog*"[tiab] |
| #3 | "administration, oral"[MeSH] OR "oral*"[tiab] OR "per os"[tiab] OR "by mouth"[tiab] |
| #4 | "tool*"[tiab] OR "instrument*"[tiab] OR "scale*"[tiab] OR "questionnaire*"[tiab] OR "measure*"[tiab] OR "assess*"[tiab] |
| #5 | (instrumentation[sh] OR methods[sh] OR “Validation Study”[pt] OR “Comparative Study”[pt] OR “psychometrics”[MeSH] OR psychometr*[tiab] OR clinimetr*[tw] OR clinometr*[tw] OR “Outcome Assessment, Health Care”[MeSH] OR “outcome assessment”[tiab] OR “outcome measure*”[tw] OR “observer variation”[MeSH] OR “observer variation”[tiab] OR “Health Status Indicators”[Mesh] OR “reproducibility of results”[MeSH] OR reproducib*[tiab] OR “discriminant analysis”[MeSH] OR reliab*[tiab] OR unreliab*[tiab] OR valid*[tiab] OR “coefficient of variation”[tiab] OR coefficient[tiab] OR homogeneity[tiab] OR homogeneous[tiab] OR “internal consistency”[tiab] OR (cronbach*[tiab] AND (alpha[tiab] OR alphas[tiab])) OR (item[tiab] AND (correlation*[tiab] OR selection*[tiab] OR reduction*[tiab])) OR agreement[tw] OR precision[tw] OR imprecision[tw] OR “precise values”[tw] OR test-retest[tiab] OR (test[tiab] AND retest[tiab]) OR (reliab*[tiab] AND (test[tiab] OR retest[tiab])) OR stability[tiab] OR interrater[tiab] OR inter-rater[tiab] OR intrarater[tiab] OR intra-rater[tiab] OR intertester[tiab] OR inter-tester[tiab] OR intratester[tiab] OR intra-tester[tiab] OR interobserver[tiab] OR inter-observer[tiab] OR intraobserver[tiab] OR intra-observer[tiab] OR intertechnician[tiab] OR inter-technician[tiab] OR intratechnician[tiab] OR intra-technician[tiab] OR interexaminer[tiab] OR inter-examiner[tiab] OR intraexaminer[tiab] OR intra-examiner[tiab] OR interassay[tiab] OR inter-assay[tiab] OR intraassay[tiab] OR intra-assay[tiab] OR interindividual[tiab] OR inter-individual[tiab] OR intraindividual[tiab] OR intra-individual[tiab] OR interparticipant[tiab] OR inter-participant[tiab] OR intraparticipant[tiab] OR intra-participant[tiab] OR kappa[tiab] OR kappa’s[tiab] OR kappas[tiab] OR repeatab*[tw] OR ((replicab*[tw] OR repeated[tw]) AND (measure[tw] OR measures[tw] OR findings[tw] OR result[tw] OR results[tw] OR test[tw] OR tests[tw])) OR generaliza*[tiab] OR generalisa*[tiab] OR concordance[tiab] OR (intraclass[tiab] AND correlation*[tiab]) OR discriminative[tiab] OR “known group”[tiab] OR “factor analysis”[tiab] OR “factor analyses”[tiab] OR “factor structure”[tiab] OR “factor structures”[tiab] OR dimension*[tiab] OR subscale*[tiab] OR (multitrait[tiab] AND scaling[tiab] AND (analysis[tiab] OR analyses[tiab])) OR “item discriminant”[tiab] OR “interscale correlation*”[tiab] OR error[tiab] OR errors[tiab] OR “individual variability”[tiab] OR “interval variability”[tiab] OR “rate variability”[tiab] OR (variability[tiab] AND (analysis[tiab] OR values[tiab])) OR (uncertainty[tiab] AND (measurement[tiab] OR measuring[tiab])) OR “standard error of measurement”[tiab] OR sensitiv*[tiab] OR responsive*[tiab] OR (limit[tiab] AND detection[tiab]) OR “minimal detectable concentration”[tiab] OR interpretab*[tiab] OR ((minimal[tiab] OR minimally[tiab] OR clinical[tiab] OR clinically[tiab]) AND (important[tiab] OR significant[tiab] OR detectable[tiab]) AND (change[tiab] OR difference[tiab])) OR (small*[tiab] AND (real[tiab] OR detectable[tiab]) AND (change[tiab] OR difference[tiab])) OR “meaningful change”[tiab] OR “ceiling effect”[tiab] OR “floor effect”[tiab] OR “Item response model”[tiab] OR IRT[tiab] OR Rasch[tiab] OR “Differential item functioning”[tiab] OR DIF[tiab] OR “computer adaptive testing”[tiab] OR “item bank”[tiab] OR “cross-cultural equivalence”[tiab]) |
| #6 | #1 AND #2 AND #3 AND #4 AND #5  Filters applied: from 1000/1/1 - 2023/12/31. |

**EMBASE**

Search time: 2024-1-26

| **Search** | **Query** |
| --- | --- |
| #1 | 'medication compliance'/exp OR 'patient compliance'/de OR 'medication adherence':ab,ti OR 'patient compliance':ab,ti OR 'medication compliance':ab,ti OR 'patient adherence':ab,ti OR 'medication persistence':ab,ti OR 'drug adherence':ab,ti OR 'drug compliance':ab,ti OR 'medicine adherence':ab,ti OR 'medicine compliance':ab,ti OR 'treatment adherence':ab,ti OR 'treatment compliance':ab,ti OR 'adherence to treatment':ab,ti OR 'compliance with treatment':ab,ti OR 'therapy adherence':ab,ti OR 'therapy compliance':ab,ti OR 'adherence to therapy':ab,ti OR 'compliance with therapy':ab,ti OR 'adherence to pharmacotherapy':ab,ti OR 'noncompliance':ab,ti OR 'non compliance':ab,ti OR 'nonadherence':ab,ti OR 'non adherence':ab,ti |
| #2 | 'neoplasm'/exp OR 'carcinoma'/exp OR 'sarcoma'/exp OR 'oncology'/exp OR 'neoplasm*':ab,ti OR 'carcino*':ab,ti OR 'sarco*':ab,ti OR 'cancer*':ab,ti OR 'tumor*':ab,ti OR 'malignan*':ab,ti OR 'oncolog*':ab,ti |
| #3 | 'oral drug administration'/exp OR 'oral*':ab,ti OR 'per os':ab,ti OR 'by mouth':ab,ti |
| #4 | 'questionnaire'/exp OR 'questionnaire*':ab,ti OR 'tool*':ab,ti OR 'scale*':ab,ti OR 'instrument*':ab,ti OR 'measure*':ab,ti OR 'assess*':ab,ti |
| #5 | 'intermethod comparison'/exp OR 'data collection method'/exp OR 'validation study'/exp OR 'feasibility study'/exp OR 'pilot study'/exp OR 'psychometry'/exp OR 'reproducibility'/exp OR reproducib*:ab,ti OR 'audit':ab,ti OR psychometr*:ab,ti OR clinimetr*:ab,ti OR clinometr*:ab,ti OR 'observer variation'/exp OR 'observer variation':ab,ti OR 'discriminant analysis'/exp OR 'validity'/exp OR reliab*:ab,ti OR valid*:ab,ti OR 'coefficient':ab,ti OR 'internal consistency':ab,ti OR (cronbach*:ab,ti AND ('alpha':ab,ti OR 'alphas':ab,ti)) OR 'item correlation':ab,ti OR 'item correlations':ab,ti OR 'item selection':ab,ti OR 'item selections':ab,ti OR 'item reduction':ab,ti OR 'item reductions':ab,ti OR 'agreement':ab,ti OR 'precision':ab,ti OR 'imprecision':ab,ti OR 'precise values':ab,ti OR 'test–retest':ab,ti OR ('test':ab,ti AND 'retest':ab,ti) OR (reliab*:ab,ti AND ('test':ab,ti OR 'retest':ab,ti)) OR 'stability':ab,ti OR 'interrater':ab,ti OR 'inter-rater':ab,ti OR 'intrarater':ab,ti OR 'intra-rater':ab,ti OR 'intertester':ab,ti OR 'inter-tester':ab,ti OR 'intratester':ab,ti OR 'intra-tester':ab,ti OR 'interobeserver':ab,ti OR 'inter-observer':ab,ti OR 'intraobserver':ab,ti OR 'intra-observer':ab,ti OR 'intertechnician':ab,ti OR 'intratechnician':ab,ti OR 'intra-technician':ab,ti OR 'interexaminer':ab,ti OR 'inter-examiner':ab,ti OR 'intraexaminer':ab,ti OR 'interassay':ab,ti OR 'inter-assay':ab,ti OR 'intraassay':ab,ti OR 'intra-assay':ab,ti OR 'interindividual':ab,ti OR 'inter-individual':ab,ti OR 'intraindividual':ab,ti OR 'intra-individual':ab,ti OR 'interparticipant':ab,ti OR 'inter-participant':ab,ti OR 'intraparticipant':ab,ti OR 'intra-participant':ab,ti OR 'kappa':ab,ti OR 'kappas':ab,ti OR 'coefficient of variation':ab,ti OR repeatab*:ab,ti OR ((replicab*:ab,ti OR 'repeated':ab,ti) AND ('measure':ab,ti OR 'measures':ab,ti OR 'findings':ab,ti OR 'result':ab,ti OR 'results':ab,ti OR 'test':ab,ti OR 'tests':ab,ti)) OR generaliza*:ab,ti OR generalisa*:ab,ti OR 'concordance':ab,ti OR ('intraclass':ab,ti AND correlation*:ab,ti) OR 'discriminative':ab,ti OR 'known group':ab,ti OR 'factor analysis':ab,ti OR 'factor analyses':ab,ti OR 'factor structure':ab,ti OR 'factor structures':ab,ti OR 'dimensionality':ab,ti OR subscale*:ab,ti OR 'multitrait scaling analysis':ab,ti OR 'multitrait scaling analyses':ab,ti OR 'item discriminant':ab,ti OR 'interscale correlation':ab,ti OR 'interscale correlations':ab,ti OR (('error':ab,ti OR 'errors':ab,ti) AND (measure*:ab,ti OR correlat*:ab,ti OR evaluat*:ab,ti OR 'accuracy':ab,ti OR 'accurate':ab,ti OR 'precision':ab,ti OR 'mean':ab,ti)) OR 'individual variability':ab,ti OR 'interval variability':ab,ti OR 'rate variability':ab,ti OR 'variability analysis':ab,ti OR ('uncertainty':ab,ti AND ('measurement':ab,ti OR 'measuring':ab,ti)) OR 'standard error of measurement':ab,ti OR sensitiv*:ab,ti OR responsive*:ab,ti OR ('limit':ab,ti AND 'detection':ab,ti) OR 'minimal detectable concentration':ab,ti OR interpretab*:ab,ti OR (small*:ab,ti AND ('real':ab,ti OR 'detectable':ab,ti) AND ('change':ab,ti OR 'difference':ab,ti)) OR 'meaningful change':ab,ti OR 'minimal important change':ab,ti OR 'minimal important difference':ab,ti OR 'minimally important change':ab,ti OR 'minimally important difference':ab,ti OR 'minimal detectable change':ab,ti OR 'minimal detectable difference':ab,ti OR 'minimally detectable change':ab,ti OR 'minimally detectable difference':ab,ti OR 'minimal real change':ab,ti OR 'minimal real difference':ab,ti OR 'minimally real change':ab,ti OR 'minimally real difference':ab,ti OR 'ceiling effect':ab,ti OR 'floor effect':ab,ti OR 'item response model':ab,ti OR 'irt':ab,ti OR 'rasch':ab,ti OR 'differential item functioning':ab,ti OR 'dif':ab,ti OR 'computer adaptive testing':ab,ti OR 'item bank':ab,ti OR 'cross-cultural equivalence':ab,ti |
| #6 | #1 AND #2 AND #3 AND #4 AND #5  Limit to: yr="1966 - 2023" |

**Web of Science Core Collection**

Search time: 2024-1-26

| **Search** | **Query** |
| --- | --- |
| #1 | TS=("medication adherence" OR "patient compliance" OR "medication compliance" OR "patient adherence" OR "medication persistence" OR "drug adherence" OR "drug compliance" OR "medicine adherence" OR "medicine compliance" OR "treatment adherence" OR "treatment compliance" OR "adherence to treatment" OR "compliance with treatment" OR "therapy adherence" OR "therapy compliance" OR "adherence to therapy" OR "compliance with therapy" OR "adherence to pharmacotherapy" OR "noncompliance" OR "non compliance" OR "nonadherence" OR "non adherence") |
| #2 | TS=("neoplasm*" OR "carcino*" OR "sarco*" OR "cancer*" OR "tumor*" OR "malignan*" OR "oncolog*") |
| #3 | TS=("oral*" OR "per os" OR "by mouth") |
| #4 | TS= ("tool*" OR "instrument*" OR "scale*" OR "questionnaire*" OR "measure*" OR "assess*") |
| #5 | TS=(instrumentation OR methods OR "Validation Study" OR "Comparative Study" OR "psychometrics" OR psychometr* OR clinimetr* OR clinometr* OR "outcome assessment" OR "outcome measure*" OR "observer variation" OR "observer variation" OR "Health Status Indicators" OR "reproducibility of results" OR reproducib* OR "discriminant analysis" OR reliab* OR unreliab* OR valid* OR "coefficient of variation" OR coefficient OR homogeneity OR homogeneous OR "internal consistency" OR (cronbach* AND (alpha OR alphas)) OR (item AND (correlation* OR selection* OR reduction*)) OR agreement OR precision OR imprecision OR "precise values" OR test–retest OR (test AND retest) OR (reliab* AND (test OR retest)) OR stability OR interrater OR inter-rater OR intrarater OR intra-rater OR intertester OR inter-tester OR intratester OR intra-tester OR interobserver OR inter-observer OR intraobserver OR intra-observer OR intertechnician OR inter-technician OR intratechnician OR intra-technician OR interexaminer OR inter-examiner OR intraexaminer OR intra-examiner OR interassay OR inter-assay OR intraassay OR intra-assay OR interindividual OR inter-individual OR intraindividual OR intra-individual OR interparticipant OR inter-participant OR intraparticipant OR intra-participant OR kappa OR kappa’s OR kappas OR repeatab* OR interexaminer OR inter-examiner OR intraexaminer OR intra-examiner OR interassay OR inter-assay OR intraassay OR intra-assay OR interindividual OR inter-individual OR intraindividual OR intra-individual OR interparticipant OR inter-participant OR intraparticipant OR intra-participant OR kappa OR kappa’s OR kappas OR repeatab* OR ((replicab* OR repeated) AND (measure OR measures OR findings OR result OR results OR test OR tests)) OR generaliza* OR generalisa* OR concordance OR (intraclass AND correlation*) OR discriminative OR "known group" OR "factor analysis" OR "factor analyses" OR "factor structure" OR "factor structures" OR dimension* OR subscale* OR (multitrait AND scaling AND (analysis OR analyses)) OR interexaminer OR inter-examiner OR intraexaminer OR intra-examiner OR interassay OR inter-assay OR intraassay OR intra-assay OR interindividual OR inter-individual OR intraindividual OR intra-individual OR interparticipant OR inter-participant OR intraparticipant OR intra-participant OR kappa OR kappa’s OR kappas OR repeatab* OR ((replicab* OR repeated) AND (measure OR measures OR findings OR result OR results OR test OR tests)) OR generaliza* OR generalisa* OR concordance OR (intraclass AND correlation*) OR discriminative OR "known group" OR "factor analysis" OR "factor analyses" OR "factor structure" OR "factor structures" OR dimension* OR subscale* OR (multitrait AND scaling AND (analysis OR analyses)) OR "item discriminant" OR "interscale correlation*" OR error OR errors OR "individual variability" OR "interval variability" OR "rate variability" OR (variability AND (analysis OR values)) OR (uncertainty AND (measurement OR measuring)) OR "standard error of measurement" OR sensitiv* OR responsive* OR (limit AND detection) OR "minimal detectable concentration" OR interpretab* OR ((minimal OR minimally OR clinical OR clinically) AND (important OR significant OR detectable) AND (change OR difference)) OR (small* AND (real OR detectable) AND (change OR difference)) OR "meaningful change" OR "ceiling effect" OR "floor effect" OR "Item response model" OR IRT OR Rasch OR "Differential item functioning" OR DIF OR "computer adaptive testing" OR "item bank" OR "cross-cultural equivalence") |
| #6 | (#1 AND #2 AND #3 AND #4AND #5 ) AND DOP=(1900-01-01 to 2023-12-31) |

**CINAHL**

Search time: 2024-1-26

| **Search** | **Query** |
| --- | --- |
| #1 | (MH "Medication Compliance") OR (MH "Patient Compliance+") OR TI ("medication adherence" OR "patient compliance" OR "medication compliance" OR "patient adherence" OR "medication persistence" OR "drug adherence" OR "drug compliance" OR "medicine adherence" OR "medicine compliance" OR "treatment adherence" OR "treatment compliance" OR "adherence to treatment" OR "compliance with treatment" OR "therapy adherence" OR "therapy compliance" OR "adherence to therapy" OR "compliance with therapy" OR "adherence to pharmacotherapy" OR "noncompliance" OR "non compliance" OR "nonadherence" OR "non adherence") OR AB ("medication adherence" OR "patient compliance" OR "medication compliance" OR "patient adherence" OR "medication persistence" OR "drug adherence" OR "drug compliance" OR "medicine adherence" OR "medicine compliance" OR "treatment adherence" OR "treatment compliance" OR "adherence to treatment" OR "compliance with treatment" OR "therapy adherence" OR "therapy compliance" OR "adherence to therapy" OR "compliance with therapy" OR "adherence to pharmacotherapy" OR "noncompliance" OR "non compliance" OR "nonadherence" OR "non adherence") |
| #2 | (MH "Neoplasms+") OR (MH "Carcinoma+") OR (MH "Sarcoma+") OR (MH "oncology+") OR TI ("neoplasm*" OR "carcino*" OR "sarco*" OR "cancer*" OR "tumor*" OR "malignan*" OR "oncolog*") OR AB ("neoplasm*" OR "carcino*" OR "sarco*" OR "cancer*" OR "tumor*" OR "malignan*" OR "oncolog*") |
| #3 | (MH "Administration, Oral+") OR TI ("oral*" OR "per os" OR "by mouth") OR AB ("oral*" OR "per os" OR "by mouth") |
| #4 | TI ( "tool*" OR "instrument*" OR "scale*" OR "questionnaire*" OR "measure*" OR "assess*" ) OR AB ( "tool*" OR "instrument*" OR "scale*" OR "questionnaire*" OR "measure*" OR "assess*" ) |
| #5 | AB (psychometr* OR outcome assessment OR observer variation OR reproducib* OR reliab* OR unreliab* OR valid* OR coefficient of variation OR coefficient OR homogeneity OR homogeneous OR internal consistency OR test-retest OR stability OR interrater OR inter-rater OR intrarater OR intra-rater OR intertester OR inter-tester OR intratester OR intra-tester OR interobserver OR inter-observer OR intraobserver OR intra-observer OR intertechnician OR inter-technician OR intratechnician OR intra-technician OR interexaminer OR inter-examiner OR intraexaminer OR intra-examiner OR interassay OR inter-assay OR intraassay OR intra-assay OR interindividual OR inter-individual OR intraindividual OR intra-individual OR interparticipant OR inter-participant OR intraparticipant OR intra-participant OR kappa* OR generaliza* OR generalisa* OR concordance OR discriminative OR known group OR factor analysis OR factor analyses OR factor structure OR factor structures OR dimension* OR subscale* OR item discriminant OR interscale correlation* OR error OR errors OR individual variability OR interval variability OR rate variability OR standard error of measurement OR sensitiv* OR responsive* OR minimal detectable concentration OR interpretab* OR meaningful change OR ceiling effect OR floor effect OR Item response model OR IRT OR Rasch OR Differential item functioning OR DIF OR computer adaptive testing OR item bank OR cross-cultural equivalence) OR (cronbach* and (alpha or alphas)) OR (item and (correlation* or selection* or reduction*)) OR (reliab* and (test or retest)) OR (reliab* and (test or retest)) OR (intraclass and correlation*) OR (multitrait and scaling and (analysis or analyses)) OR (variability and (analysis or values)) OR (uncertainty and (measurement or measuring)) OR (limit and detection) OR ((minimal or minimally or clinical or clinically) and (important or significant or detectable) and (change or difference)) OR (small* and (real or detectable) and (change or difference)) |
| #6 | #1 AND #2 AND #3 AND #4 AND #5  Limiters: until December 2023 |

CNKI

Search time: 2024-1-26

| **Query** |
| --- |
| TKA=('服药依从性' + '用药依从性' + '药物依从性' + '患者依从性' + '治疗依从性') AND TKA=('癌症' + '肿瘤') AND TKA = '口服' AND TKA=('量表' + '工具' + '问卷') AND TKA=('属性' + '特性' + '性能' + '信度' + '效度' + '构建' + '建立' + '开发' + '验证' )  Filters applied：until 2023-12-31 |

WanFang

Search time: 2024-1-26

| **Query** |
| --- |
| (题名或关键词:("服药依从性" OR "用药依从性" OR "药物依从性" OR "患者依从性" OR "治疗依从性") OR 摘要:("服药依从性" OR "用药依从性" OR "药物依从性" OR "患者依从性" OR "治疗依从性") ) AND (题名或关键词:("癌症" OR "肿瘤") OR 摘要:("癌症" OR "肿瘤")) AND (题名或关键词: "口服" OR 摘要: "口服" ) AND (题名或关键词:("量表" OR "工具" OR "问卷") OR 摘要:("量表" OR "工具" OR "问卷")) AND (题名或关键词:("属性" OR "特性" OR "性能" OR "信度" OR "效度" OR "构建"OR "建立"OR "开发"OR "验证") OR 摘要:("属性" OR "特性" OR "性能" OR "信度" OR "效度" OR "构建"OR "建立"OR "开发"OR "验证"))  Filters applied：until December 2023 |

Weipu

Search time: 2024-1-26

| **Query** |
| --- |
| (M=("服药依从性" OR "用药依从性" OR "药物依从性" OR "患者依从性" OR "治疗依从性") OR R=("服药依从性" OR "用药依从性" OR "药物依从性" OR "患者依从性" OR "治疗依从性") ) AND (M=("癌症" OR "肿瘤") OR R=("癌症" OR "肿瘤")) AND (M="口服" OR R="口服" ) AND (M=("量表" OR "工具" OR "问卷") OR R=("量表" OR "工具" OR "问卷")) AND (M=("属性" OR "特性" OR "性能" OR "信度" OR "效度" OR "构建"OR "建立"OR "开发"OR "验证") OR R=("属性" OR "特性" OR "性能" OR "信度" OR "效度" OR "构建"OR "建立"OR "开发"OR "验证"))  Filters applied：until December 2023 |

Sinomed

Search time: 2024-1-26

| **Query** |
| --- |
| ( ""服药依从性""[常用字段:智能] OR ""用药依从性""[常用字段:智能] OR ""药物依从性""[常用字段:智能] OR ""患者依从性""[常用字段:智能] OR ""治疗依从性""[常用字段:智能]) AND( ""癌症""[常用字段:智能] OR ""肿瘤""[常用字段:智能]) AND ""口服""[常用字段:智能] AND( ""属性""[常用字段:智能] OR ""特性""[常用字段:智能] OR ""性能""[常用字段:智能] OR ""信度""[常用字段:智能] OR ""效度""[常用字段:智能] OR ""构建"OR "建立"OR "开发"OR "验证""[常用字段:智能])  Filters applied：until December 2023 |
